# Supplementary material for: A kernel-based machine learning potential and quantum vibrational state analysis of the cationic Ar hydride (Ar2H+)
Source: Royal Society of Chemistry journal article supplement (doi:10.1039/d3cp05865d), 2024-01-01
Supplement: d3cp05865d1.pdf [file d3cp05865d1.pdf]

# A kernel-based machine learning potential and quantum vibrational state analysis of the cationic Argon hydride ( $\text{Ar}_2\text{H}^+$ )

María Judit Montes de Oca-Estévez<sup>1,2,a</sup>, Álvaro Valdés<sup>3</sup>, and Rita Prosmi<sup>1\*</sup>

<sup>1</sup> *Institute of Fundamental Physics (IFF-CSIC), CSIC, Serrano 123, 28006 Madrid, Spain*

<sup>2</sup> *Atelgraphics S.L., Mota de Cuervo 42, 28043, Madrid, Spain*

<sup>3</sup> *Escuela de Física, Universidad Nacional de Colombia, Sede Medellín, A. A. 3840,  
Medellín, Colombia*

<sup>a</sup> *Doctoral Programme in Theoretical Chemistry and Computational Modelling, Doctoral  
School, Universidad Autónoma de Madrid, Spain*

E-mail: rita@iff.csic.es

## Supporting Information Available

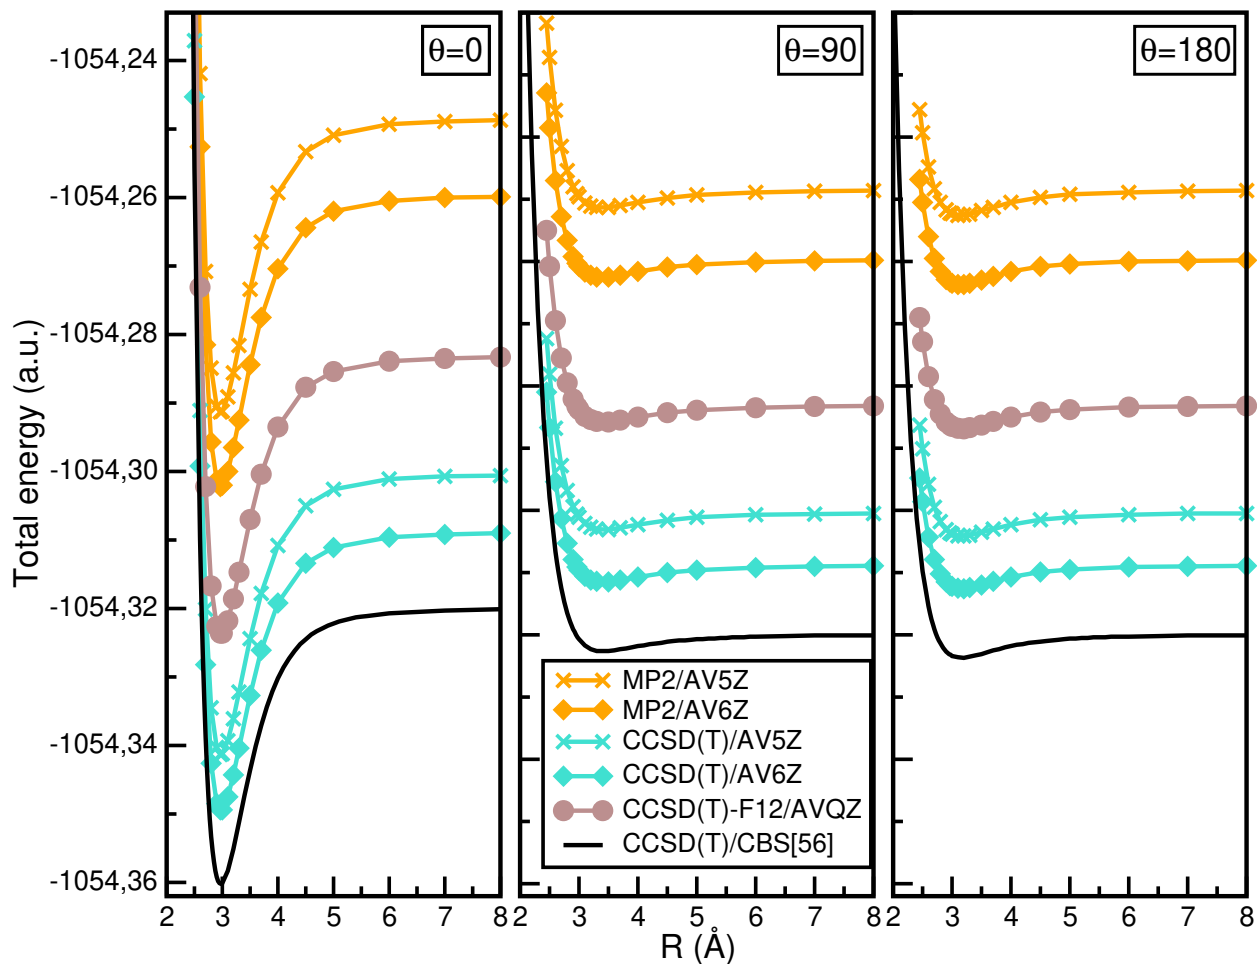

Figure S1: Total electronic energies as a function of  $R$  distance at  $\theta = 0^\circ$ ,  $90^\circ$  and  $180^\circ$  from MP2, CCSD(T) and CCSD(T)-F12 calculations using different basis sets for the  $[\text{Ar}_2\text{H}]^+$  cation.

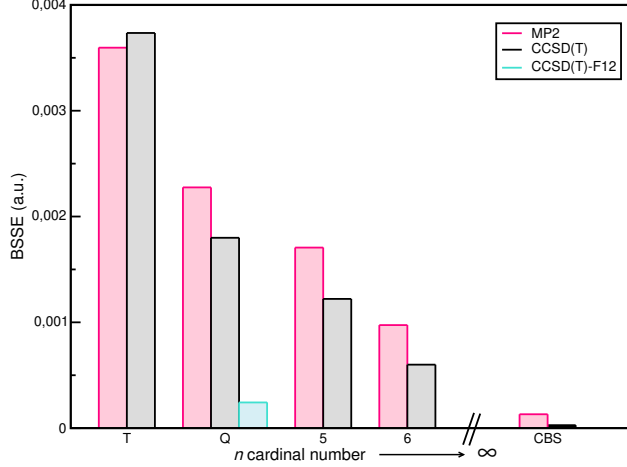

Figure S2: Influence of the BSSE correction in the equilibrium geometry for different level of theory (MP2, CCSD(T) and CCSD(T)-F12) using the correlation consistent basis set family, AVnZ (where  $n$  is T, Q, 5 and 6). The CBS[56] extrapolation values are also shown.

**Table S1: Vibrational energies (in  $\text{cm}^{-1}$ ) obtained from quantum variational bound states calculations for the indicated  $[\text{Ar}_2\text{H}]^+$  isotopes using the RKHS-ML PES.**

| No state( $v$ ) | $^{36}\text{Ar}_2\text{H}^+$ | $^{40}\text{Ar}_2\text{H}^+$ |
|-----------------|------------------------------|------------------------------|
| 0               | 1367.00                      | 1356.64                      |
| 1               | 1672.85                      | 1647.29                      |
| 2               | 1977.67                      | 1937.29                      |
| 3               | 2277.06                      | 2222.80                      |
| 4               | 2345.57                      | 2333.66                      |
| 5               | 2568.05                      | 2501.29                      |
| 6               | 2620.43                      | 2595.33                      |
| 7               | 2691.07                      | 2678.24                      |
| 8               | 2847.75                      | 2770.31                      |
| 9               | 2886.17                      | 2848.83                      |
| 10              | 2976.01                      | 2948.78                      |
| 11              | 3114.23                      | 3028.06                      |
| 12              | 3136.68                      | 3088.69                      |
| 13              | 3251.07                      | 3211.50                      |
| 14              | 3366.04                      | 3273.02                      |
| 15              | 3372.78                      | 3315.45                      |
| 16              | 3463.53                      | 3438.49                      |
| 17              | 3480.38                      | 3451.23                      |
| 18              | 3593.15                      | 3503.08                      |
| 19              | 3599.43                      | 3532.22                      |
